# Supplementary material for: Machine learning algorithms enhance the specificity of cancer biomarker detection using SERS-based immunoassays in microfluidic chips
Source: PubMed Central journal article supplement — RSC Adv. 2019 Jan 15;9(4):1859–68. doi: 10.1039/c8ra08930b (PMC9059745; doi:10.1039/c8ra08930b), 2019-01-15
Supplement: RA-009-C8RA08930B-s001.pdf [file RA-009-C8RA08930B-s001.pdf]

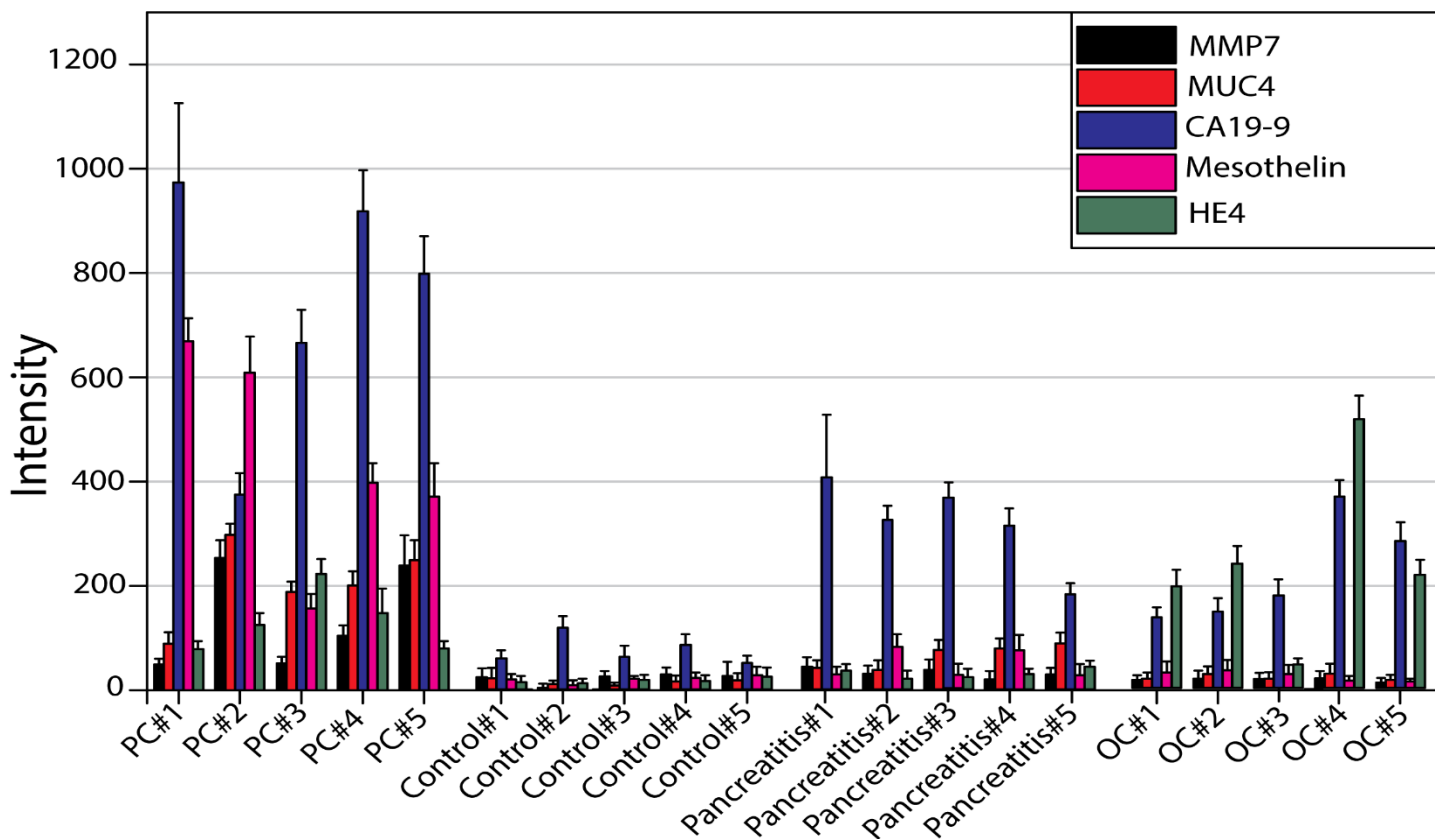

**Supplementary Figure 1:** SERS detection of CA19-9, HE4, Mesothelin, MMP7 and MUC4 in serum of normal, PC, ovarian cancer and pancreatitis samples (total of 20 sera samples). The antigen concentration was quantified using ( $\nu_s(\text{NO}_2$ ) of 4-NBT intensity at the  $1336\text{ cm}^{-1}$  position averaged over five readouts on each address. For reproducibility, three addresses were measured for each concentration. Error bars show the standard deviation.

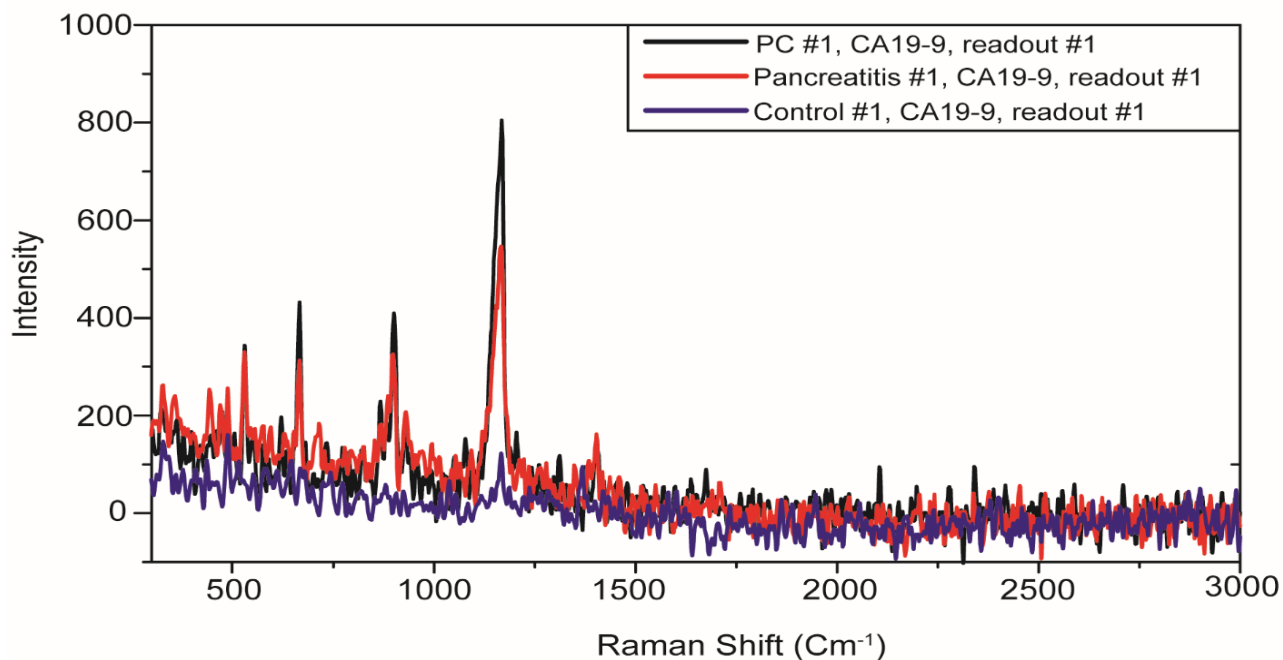

**Supplementary Figure 2.** First readouts of SERS spectra for detection of CA19-9 in PC#1, Pancreatitis#1 and Control#1.
